# Supplementary material for: Gut-derived memory γδT17 cells exacerbate sepsis-induced acute lung injury
Source: Research Square preprint supplement (doi:10.21203/rs.3.rs-3680704/v1), 2024-01-05
Supplement: Supplementary file 1 [file 186d72bb2ce5eb3eecb477ef.docx]

**Extended data table 1.**

**Key resources table**

| **Reagent or resource** | **Company** | **Identifier** |
| --- | --- | --- |
| **Antibodys** |  |  |
| CCL1 | R&D Systems | Cat# MAB845; RRID: AB_2070618 |
| IL-17A | Santa Cruz | Cat# sc-374218, RRID:AB_10988239 |
| β-actin | Proteintech | Cat# 66009-1-Ig, RRID:AB_2687938 |
| GAPDH | Proteintech | Cat# 60004-1-Ig, RRID:AB_2107436 |
| IL-6 | Abcam | Cat# ab229381, RRID:AB_2861234 |
| IL-1β | ABclonal | Cat# A1112, RRID:AB_2758416 |
| TNF-α | Abclonal | Cat# A11534, RRID:AB_2758597 |
| MUC-2 | Proteintech | Cat# 27675-1-AP, RRID:AB_2880943 |
| ZO-1 | Proteintech | Cat# 21773-1-AP, RRID:AB_10733242 |
| Occludin | Proteintech | Cat# 27260-1-AP, RRID:AB_2880820 |
| Wnt5a | Zen Bio | Cat# 619919, RRID:AB_2927750 |
| FZD5 | Zen Bio | Cat# 222996, RRID:AB_3075327 |
| β-Catenin | Proteintech | Cat# 51067-2-AP, RRID:AB_2086128 |
| Lef1 | Proteintech | Cat# 14972-1-AP, RRID:AB_2265677 |
| TCF1/7 | Abclonal | Cat# A20835, RRID:AB_3066057 |
| PerCP-Cy™5.5 Rat Anti-Mouse CD45 | BD Biosciences | Cat# 550994, RRID:AB_394003 |
| FITC Rat Anti-CD11b | BD Biosciences | Cat# 561688, RRID:AB_10898180 |
| PE-Cy™7 Rat Anti-Mouse Ly-6G | BD Biosciences | Cat# 560601, RRID:AB_1727562 |
| APC Rat anti-Mouse CD86 | BD Biosciences | Cat# 558703, RRID:AB_2075114 |
| BV421 Rat Anti-Mouse F4/80 | BD Biosciences | Cat# 565411, RRID:AB_2734779 |
| BV650 Hamster Anti-Mouse CD11c | BD Biosciences | Cat# 564079, RRID:AB_2725779 |
| Purified Rat Anti-Mouse Siglec-F | BD Biosciences | Cat# 552125, RRID:AB_394340 |
| CD206-BV605 | Biolegend | Cat# 141721, RRID:AB_2562340 |
| Fixable Viability Stain 510 | BD Biosciences | Cat# 564406, RRID:AB_2869572 |
| FITC Rat Anti-Mouse CD45 | BD Biosciences | Cat# 553079, RRID:AB_394609 |
| PE-Cy™7 Hamster Anti-Mouse CD3e | BD Biosciences | Cat# 552774, RRID:AB_394460 |
| APC Anti-mouse TCR γ/δ | Biolegend | Cat# 118115 (also 118116), RRID:AB_1731824 |
| Brilliant Violet 421™ anti-mouse IL-17A | Biolegend | Cat# 506925 (also 506926), RRID:AB_10900442 |
| CD8a-APC/Fire750 | Sigma-Aldrich | Cat# 100766 (also 100765), RRID:AB_2572113 |
| Purified Rat Anti-Mouse CD16/CD32 | BD Biosciences | Cat# 553141, RRID:AB_39465 |
| BV786 Rat Anti-Mouse CD44 | BD Biosciences | Cat# 563736, RRID:AB_2738395 |
| Alexa Fluor 700 Rat Anti-Mouse Ly-6C (AL-21) | BD Biosciences | Cat# 561237, RRID:AB_10612017 |
| FITC Rat Anti-Mouse IFN-γ(XMG1.2) | BD Biosciences | Cat# 554411, RRID:AB_395375 |
| PE anti-mouse CD198 (CCR8) | Biolegend | Cat# 150311 (also 150312), RRID:AB_2617032 |
| Purified Hamster Anti-Mouse TCR γδ (GL4) | BD Biosciences | Cat# 553180, RRID:AB_394690 |
| IL-7R-BV605 | Thermo Fisher Scientific | Cat# 416-1271-82, RRID:AB_2929104 |
| Goat Anti-Rabbit IgG H&L (Alexa Fluor® 488) | Abcam | Cat# ab150077, RRID:AB_2630356 |
| Goat Anti-Mouse IgG H&L (Alexa Fluor® 594) | Abcam | Cat# ab150116, RRID:AB_2650601 |
| Goat Anti-Rabbit IgG H&L (HRP) | Abcam | Cat# ab205718, RRID:AB_2819160 |
| Cith3 | Abcam | Cat# ab5103, RRID:AB_304752 |
| MPO | Abcam | Cat# ab208670, RRID:AB_2864724 |
| **Chemicals, adenoviruses and recombinant proteins** |  |  |
| Esketamine | Hengrui |  |
| LPS (Escherichia coli; 055:B5) | Sigma-Aldrich | Cat# L2880 |
| Recombinant human CCL1 protein | R&D Systems | Cat# 272-I |
| iCRT14 | Selleck | Cat# S8704 |
| pADV-U6-shRNA (Ccl1)-CMV-MCS | Obio | Cat# Y25327 |
| pADV-U6-shRNA (NC2)-CMV-MCS | Obio | Cat# Y5068 |
| pADV-U6-shRNA (Il17a)-CMV-EGFP | Obio | Cat# Y22590 |
| pADV-U6-shRNA (NC2)-CMV-EGFP | Obio | Cat# Y201NC2 |
| pAdeno-EF1A(S)-mNeonGreen-CMV-MCS-3FLAG | Obio | Cat# H12588 |
| pcADV-EF1-mNeonGreen-CMV-Il17a-3xFLAG | Obio | Cat# H27226 |
| **Critical commercial assays** |  |  |
| TCR g/d cell isolation kit | Miltenyi | Cat# 130-092-125 |
| Cytometric bead array (CBA) mouse Th1/Th2/Th17 cytokine kit | BD Biosciences | Cat# 560485 |
| MPO assay kit | Nanjing Jiancheng | Cat# A044-1-1 |
| QuantiCyto® Mouse IL-6 ELISA kit | Neobioscience | Cat# EMC004.96 |
| QuantiCyto® Mouse IL-17/IL-17A ELISA kit | Neobioscience | Cat# EMC008.96 |
| QuantiCyto® Mouse TNF-α ELISA kit | Neobioscience | Cat# EMC102a.96 |
| Bio-plex pro mouse chemokine Panel 31-Plex | Bio-rad | Cat# 12009159 |
